## 1 Network-based spreading of grey matter changes across different stages of psychosis

2  
3 Sidhant Chopra<sup>1,2,3</sup>, Ashlea Segal<sup>1,2</sup>, Stuart Oldham<sup>1,2</sup>, Alexander Holmes<sup>1,2</sup>, Kristina  
4 Sabaroedin<sup>1,2,12</sup>, Edwina R. Orchard<sup>1,2,4</sup>, Shona M. Francey<sup>5,6</sup>, Brian O'Donoghue<sup>5,6</sup>, Vanessa  
5 Copley<sup>7</sup>, Barnaby Nelson<sup>5,6</sup>, Jessica Graham<sup>5,6</sup>, Lara Baldwin<sup>5,6</sup>, Jeggan Tiego<sup>1,2</sup>, Hok Pan  
6 Yuen<sup>5,6</sup>, Kelly Allott<sup>5,6</sup>, Mario Alvarez-Jimenez<sup>5,6</sup>, Susy Harrigan<sup>5,6,8</sup>, Ben D. Fulcher<sup>9</sup>, Kevin  
7 Aquino<sup>9,10</sup>, Christos Pantelis<sup>7,13</sup>, Stephen J Wood<sup>5,6,11</sup>, Mark Bellgrove<sup>1</sup>, Patrick McGorry<sup>5,6</sup>,  
8 Alex Fornito<sup>1,2</sup>

- 9  
10  
11  
12 1. Turner Institute for Brain and Mental Health, School of Psychological Sciences, Monash  
13 University, Clayton, Australia  
14 2. Monash Biomedical Imaging, Monash University, Clayton, Australia  
15 3. Department of Psychology, Yale University, New Haven, USA  
16 4. Child Study Centre, Yale University, New Haven, USA  
17 5. Orygen, Parkville, Australia  
18 6. Centre for Youth Mental Health, The University of Melbourne, Melbourne, Australia  
19 7. Melbourne Neuropsychiatry Centre, Department of Psychiatry, University of Melbourne  
20 8. Centre for Mental Health, Melbourne School of Global and Population Health, The  
21 University of Melbourne, Parkville, Australian  
22 9. School of Physics, University of Sydney, New South Wales, Australia  
23 10. Centre for Complex Systems, University of Sydney, New South Wales, Australia  
24 11. School of Psychology, University of Birmingham, Edgbaston, UK  
25 12. Departments of Radiology and Paediatrics, Hotchkiss Brain Institute and Alberta  
26 Children's Hospital Research Institute, University of Calgary, Calgary, AB, Canada  
27 13. NorthWestern Mental Health, Royal Melbourne Hospital & Western Hospital Sunshine,  
28 St Albans, Victoria, Australia  
29  
30  
31  
32  
33  
34  
35  
36  
37  
38  
39  
40

### 41 Corresponding Author:

42 Sidhant Chopra ([sidhant.chopra@yale.edu](mailto:sidhant.chopra@yale.edu))  
43 Yale University  
44 Department of Psychology

45 **Key points (max 100 words)**

46

47 **Question** Are grey matter changes across the psychosis continuum constrained by brain  
48 network architecture and are certain regions epicentres of volume loss?

49

50 **Findings** Across four independent samples spanning different stages of psychotic illness,  
51 grey matter alterations are strongly constrained by the underlying architecture of the brain's  
52 axonal pathways and the hippocampus is consistently identified as a putative source from  
53 which volume-loss may spread to connected regions.

54

55 **Meaning** White matter fibres may act as conduits for the spread of pathology across all  
56 stages of psychotic illness and medial temporal regions play a critical role in the origins of  
57 grey matter reductions.

58

59

60

61

62

63

64

65

66

67

68

69

70

71

72

73

74

75

76 **Abstract (350 words)**

77 **Importance:** Psychotic illness is associated with anatomically distributed grey matter reductions that  
78 can worsen with illness progression, but the mechanisms underlying the specific spatial patterning of  
79 these changes is unknown.

80  
81 **Objective:** To test the hypothesis that brain network architecture constrains cross-sectional and  
82 longitudinal grey matter alterations across different stages of psychotic illness and to identify whether  
83 certain brain regions act as putative epicentres from which volume loss spreads.

84  
85 **Design, Settings, Participants:** This study included 534 individuals from 4 cohorts, spanning early  
86 and late stages of psychotic illness. Early-stage cohorts included patients with antipsychotic-naïve  
87 first episode psychosis (N=59) and a group of medicated patients within 3 years of psychosis onset  
88 (N=121). Late-stage cohorts comprised two independent samples of people with established  
89 schizophrenia (N=136 in total). Each patient group had a corresponding matched control group  
90 (N=218 in total). A further independent sample of healthy adults (N=346) was used to derive  
91 representative structural and functional brain networks for modelling of network-based spreading  
92 processes. We additionally examined longitudinal illness-related and antipsychotic-related grey matter  
93 changes over 3 and 12 months using a triple-blind randomised placebo-control MRI study of the  
94 antipsychotic-naïve patients. All data were collected between April 2008 and January 2020, and  
95 analyses were performed between March 2021 and January 2023.

96  
97 **Main Outcomes and Measures:** We used coordinated deformation models to predict the extent of  
98 grey matter volume change in each of 332 parcellated areas by the volume changes observed in areas  
99 to which they were structurally or functionally coupled. To identify putative epicentres of volume  
100 loss, we used a network diffusion model to simulate the spread of pathology from different seed  
101 regions. Correlations between predicted and empirical spatial patterns of grey matter volume  
102 alterations were used to quantify model performance.

103  
104 **Results:** In both early and late stages of illness, spatial patterns of cross-sectional volume differences  
105 between patients and controls were more accurately predicted by coordinated deformation models  
106 constrained by structural, rather than functional, network architecture ( $.46 < r < .57$ ;  $p < .001$ ).  
107 The same model also robustly predicted longitudinal volume changes related to illness ( $r > .52$ ;  $p < .001$ )  
108 and antipsychotic exposure ( $r > .50$ ;  $p < .001$ ). Diffusion modelling consistently identified,  
109 across all four datasets, the anterior hippocampus as a putative epicentre of pathological spread in  
110 psychosis (*all*  $p < .05$ ). Epicentres of longitudinal grey matter loss were apparent posteriorly early  
111 in the illness and shifted anteriorly to prefrontal cortex with illness progression.

112  
113 **Conclusion and Relevance:** Our findings highlight a robust and central role for white matter fibres  
114 as conduits for the spread of pathology across different stages of psychotic illness, mirroring findings  
115 reported in neurodegenerative conditions. The structural connectome thus represents a fundamental  
116 constraint on brain changes in psychosis, regardless of whether these changes are caused by illness or  
117 medication. Moreover, the anterior hippocampus represents a putative epicentre of early brain  
118 pathology from which dysfunction may spread to affect connected areas.

119  
120

121

122

123

## 124 **Introduction**

125 Psychotic disorders such as schizophrenia are characterised by anatomically distributed reductions in  
126 grey-matter volume (GMV)<sup>1-7</sup>, many of which show evidence of progression over time and across  
127 different stages of illness<sup>8-14</sup>. Meta- and mega-analyses indicate that some of the most robust cross-  
128 sectional GMV reductions are found in frontal, cingulate and temporal cortices, as well as medial  
129 temporal lobe and thalamus<sup>3-7,15-17</sup>, with longitudinal reductions identified in frontal, temporal and  
130 parietal cortices<sup>9,11</sup>. However, despite a large literature describing the location and nature of these  
131 brain changes, the specific mechanisms that give rise to their characteristic spatial pattern remain  
132 unknown.

133  
134 The human brain is an intricate network of functionally specialised regions linked by a complex web  
135 of axonal fibres, referred to as a connectome<sup>18</sup>. These fibres enable the widespread coordination of  
136 neuronal dynamics and the transport of trophic and other biological molecules throughout the brain.  
137 They can also act as conduits for the spread of pathology, such that illness processes originating in  
138 one area can propagate to affect distributed systems via multiple mechanisms<sup>19,20</sup>. This principle has  
139 been powerfully demonstrated in dementia, where GMV reductions in different neurodegenerative  
140 conditions have been shown to spread through the brain in a way that is constrained by the underlying  
141 architecture of the brain's white-matter pathways<sup>21-24</sup>.

142  
143 Recent work suggests that a network-based spreading process may also be involved in psychosis.  
144 Cross-sectional grey-matter reductions in patients correlate with increased fractional anisotropy in  
145 regionally adjacent white matter<sup>25</sup>, are often correlated across spatially distributed regions<sup>26-28</sup>, and  
146 correspond with normative connectome organisation<sup>29,30</sup>. In recent work, Shafiei, et al.<sup>31</sup> developed a  
147 coordinated-deformation model (CDM) in a sample of people with established schizophrenia that  
148 predicted the level of cross-sectional GMV reduction in an area based on the average reductions  
149 observed in other areas to which it was structurally connected.

150  
151 Together, these findings support the hypothesis that the spatial patterning of GMV loss in psychotic  
152 illness is constrained by connectome architecture. However, the few studies addressing this question  
153 have been cross-sectional and only examined patients with chronic illness, precluding an opportunity  
154 to track how coordinated grey-matter changes evolve through time and across illness stages. It thus  
155 remains unclear whether longitudinal GMV changes are actually constrained by brain network  
156 architecture, as would be expected for a network-based spreading process. Moreover, the reliance on  
157 samples of patients taking antipsychotic medication makes it difficult to determine whether coupled  
158 grey-matter changes are driven by treatments for the illness or the illness process itself.

159  
160 Here, we used multiple cohorts spanning different stages of psychosis to comprehensively evaluate  
161 network constraints on cross-sectional and longitudinal GMV changes. Specifically, we evaluated the  
162 capacity of different CDM variants, constrained by distinct aspects of connectome structure or  
163 function, to model cross-sectional GMV differences in two samples of patients at early illness stages  
164 and two samples of patients at later stages, allowing for independent replication of our findings at  
165 each stage. The early-stage samples comprised a group of antipsychotic-naïve first episode psychosis  
166 patients and a group of medicated patients within 3 years of illness onset. The late-stage samples  
167 comprised two independent samples of people with established schizophrenia. We additionally  
168 leveraged longitudinal data acquired within the context of a longitudinal, randomised placebo-  
169 controlled study in the antipsychotic-naïve FEP group<sup>32,33</sup> to evaluate the degree to which the CDMs  
170 predicted longitudinal GMV changes attributable to either antipsychotic medication or the illness

171 process itself, as observed over 3- and 12-month intervals. We then used a network-based diffusion  
 172 model to simulate the dynamic progression of GMV loss from different seed areas to determine  
 173 whether specific brain regions act as putative sources or epicentres of network-based spread. This  
 174 approach thus allowed us to robustly investigate the degree to which brain network architecture  
 175 constrains a diverse array of cross-sectional and longitudinal GMV pathology across different stages  
 176 of psychosis and to identify possible focal points of early brain volume loss.  
 177

## 178 **Methods**

### 179 **Sample characteristics**

180 This study used data from four independent datasets sampling different stages of the psychotic-illness  
 181 continuum: the STAGES clinical trial<sup>13,33</sup> (first episode psychosis; FEP), Human Connectome Project  
 182 Early Psychosis<sup>34</sup> (early psychosis; EP), BrainGluSch<sup>35</sup> (schizophrenia; SCZ-BGS), and COBRE<sup>36</sup>  
 183 (schizophrenia; SCZ-COBRE). Hereafter, these cohorts will be referred to as FEP, EP, SCZ-BGS and  
 184 SCZ-COBRE, respectively. We also derived representative structural and functional connectomes  
 185 using a large independent healthy control sample. The final number of included subjects,  
 186 demographic and diagnostic characteristics are described in Table 1 and additional details about each  
 187 dataset are provided in the Supplement 1A.  
 188  
 189  
 190

|                                      | First episode psychosis (FEP)<br>N=86 |                                |                                | Early psychosis (EP)<br>N=178 |                 | Schizophrenia (SCZ-COBRE)<br>N=138 |                 | Schizophrenia (SCZ-BGS)<br>N=132 |                 | Independent healthy control<br>N=356 |
|--------------------------------------|---------------------------------------|--------------------------------|--------------------------------|-------------------------------|-----------------|------------------------------------|-----------------|----------------------------------|-----------------|--------------------------------------|
|                                      | Placebo                               | Antipsychotic                  | Matched control                | Patient                       | Matched control | Patient                            | Matched control | Patient                          | Matched control | Independent healthy control          |
| <b>N</b>                             | Bl =30;<br>3m=21;<br>12m=22           | Bl =29;<br>3m = 20;<br>12m =14 | Bl =27;<br>3m = 21;<br>12m =21 | 121                           | 57              | 66                                 | 72              | 70                               | 62              | 356                                  |
| <b>Baseline age, years ± SD</b>      | 18.8±2.7                              | 19.5±2.9                       | 21.9±1.9                       | 23.3± 3.9                     | 23.4±3.9        | 38.0±14.1                          | 35.9±11.7       | 36.6±13.4                        | 38.22±12.4      | 23.7±5.4                             |
| <b>Baseline Females, N (%)</b>       | 14 (46.6)                             | 13 (44.8)                      | 17 (62.9)                      | 47 (38.9)                     | 30 (35.0)       | 12 (8.8)                           | 23 (31.9)       | 10 (14.2)                        | 14 (22.6)       | 198 (55.6)                           |
| <b>Diagnosis, N</b>                  |                                       |                                |                                |                               |                 |                                    |                 |                                  |                 |                                      |
| Major depression w/ psychosis        | 7                                     | 5                              | -                              | 5                             | -               | 0                                  | -               | 0                                | -               | -                                    |
| Schizophreniform disorder            | 5                                     | 5                              | -                              | 8                             | -               | 0                                  | -               | 0                                | -               | -                                    |
| Psychotic disorder NOS               | 8                                     | 7                              | -                              | 0                             | -               | 0                                  | -               | 0                                | -               | -                                    |
| Substance-induced psychotic disorder | 4                                     | 2                              | -                              | 0                             | -               | 0                                  | -               | 0                                | -               | -                                    |
| Delusional disorder                  | 1                                     | 4                              | -                              | 0                             | -               | 0                                  | -               | 0                                | -               | -                                    |
| Schizoaffective disorder             |                                       |                                |                                | 13                            | -               | 6                                  | -               | 0                                | -               | -                                    |
| Schizophrenia                        | 5                                     | 5                              | -                              | 61                            | -               | 60                                 | -               | 70                               | -               | -                                    |
| Bipolar Disorder w/ psychosis        | 0                                     | 0                              | -                              | 25                            | -               | 0                                  | -               | 0                                | -               | -                                    |
| Missing diagnosis                    | 0                                     | 1                              | -                              | 0                             | -               | 0                                  | -               | 0                                | -               | -                                    |
| <b>Illness Duration (Years)</b>      | <0.5                                  | <0.5                           | -                              | 1.8 (1.4)                     | -               | 16.0 (12.2)                        | -               | 18.2 (12.9)                      | -               | -                                    |

| Symptom severity, scale; mean $\pm$ SD   | Baseline BPRS Total; 59.4 $\pm$ 9.64 | Baseline BPRS Total; 55.8 $\pm$ 10.10 | PANSS Total; 49.7 $\pm$ 11.0 | PANSS Total; 58.4 $\pm$ 13.6 | PANSS Total; 60.7 $\pm$ 16.9 |
|------------------------------------------|--------------------------------------|---------------------------------------|------------------------------|------------------------------|------------------------------|
| Functional outcome, scale; mean $\pm$ SD | Baseline SOFAS; 52.9 $\pm$ 14.0      | Baseline SOFAS; 51.7 $\pm$ 10.6       | GAF; 66.4 $\pm$ 16.6         | CGI; 3.7 $\pm$ 0.6           | CGI; 3.9 $\pm$ 0.8           |

**Table 1 - Sample characteristics of included datasets.**

Abbreviations: NOS = not otherwise specified; BPRS = Brief Psychiatric Rating Scale version 4; SOFAS = Social and Occupational Functioning Assessment Scale; BI = baseline, 3m = 3-months, 12m = 12months; PANSS = Positive and Negative Syndrome Scale, GAF = Global Assessment of Functioning Scale (average of the social and occupational rating items); CGI: The Clinical Global Impressions Scale.

### Structural MRI processing

Acquisition parameters for structural MRI can be found in Supplement1B. Prior to processing, raw T1w scans were visually examined for artefacts and then subjected to an automated quality control procedure<sup>37</sup>. In the FEP, EP, SCZ-BGS and SCZ-COBRE datasets, three, eight, six and four patient scans did not pass image quality control, respectively, and were excluded due to artefacts (see Supplement). The remaining scans were processed using the deformation-based morphometry (DBM) pipeline of the Computational Anatomy Toolbox (version r1113)<sup>38</sup> for the Statistical Parametric Mapping 12<sup>39</sup> software running in MATLAB version 2019a (details in the Supplement1C). We used DBM to quantify volume changes because it does not require tissue segmentation, requires less spatial smoothing<sup>40</sup> than voxel-based morphometry (VBM) and to be comparable to previous work<sup>24,31</sup>. However, we replicated our primary findings using VBM (see *Robustness analyses*).

### Quantifying cross-sectional and longitudinal grey matter changes in patients

To map spatial patterns of group-level cross-sectional and longitudinal volume change, we used a robust marginal model implemented in the Sandwich Estimator Toolbox<sup>41</sup>, which combines ordinary least squares estimates of parameters of interest with estimates of variance/covariance based on a robust sandwich estimator, thus accounting for within-subject correlations in longitudinal studies. This method is asymptotically robust to misspecification of the covariance model and does not depend on the assumptions of common longitudinal variance structure across the whole brain. All contrasts were adjusted for age, sex, and handedness, with site additionally included for the EP dataset.

We conducted cross-sectional contrasts in each of the four patient datasets to capture cross-sectional GMV differences between patients and controls (Fig1A). Longitudinal GMV changes were mapped in the FEP dataset (Fig1A) to isolate: (1) illness-related change over time, by comparing GMV changes over time in the placebo group to matched healthy controls; and (2) antipsychotic-related changes over time, which compared GMV changes in the medication group to both the placebo group and matched healthy controls (see also<sup>13</sup>). Longitudinal contrasts were assessed from baseline to 3 months and baseline to 12 months, with a linear contrast being used for the latter. Contrasts were specified such that positive values in the resulting voxel-wise *t*-statistic maps indicate lower volume in patients compared to controls at cross-sectional contrast, and a greater longitudinal GMV decline in patients compared to controls in the longitudinal contrasts. The *t*-statistics were converted to *z*-scores, and we applied the CDM to unthresholded *z*-maps encoding regional GMV changes, as we are interested in capturing the spatial patterning of GMV differences across the entire brain, not just the changes which survive a statistical threshold. Renderings of the unthresholded *t*-maps can be found in Fig1A-C and Fig2A-B. FDR-corrected and uncorrected voxel-level *t*-statistic maps for each contrast are provided in the Supplements1F-1G.



235 **Brain Parcellation**

236 To relate grey-matter alterations to connectome architecture, we parcellated the brain into 300 discrete  
 237 cortical regions of approximately equal size<sup>42</sup>, in addition to 32 subcortical areas<sup>43</sup>, using previously  
 238 validated atlases. The volume change for each region was estimated as the mean  $z$ -statistic of all  
 239 voxels corresponding to that region. The regions comprise the nodes of a network, which can then be  
 240 directly related to measures of inter-regional SC and FC.

241  
 242 **Healthy reference connectomes**

243 We derived a group-level healthy structural connectome from diffusion-weighted imaging (DWI) data  
 244 from an independent sample of 356 adults (Fig1B; Table 1), which served as a reference connectome  
 245 for computational modelling. Acquisition parameters and detailed overview of DWI processing and  
 246 optimisation can be found in Supplement1D. This procedure resulted in a single  $332 \times 332$  weighted  
 247 group-average SC matrix.

248  
 249 We also derived a group-level healthy functional connectome from resting-state fMRI data acquired  
 250 in the same independent sample of adults (Fig1B). Acquisition parameters for functional MRI and  
 251 detailed information on fMRI processing can be found in Supplement1E. Given ongoing controversy  
 252 around the application of global signal regression<sup>44,45</sup>, we evaluated how this step affected our  
 253 findings (see *Robustness analyses*). After processing and denoising, we computed a whole-brain  
 254  $332 \times 332$  FC matrix for each subject using pair-wise Pearson correlations between the timeseries of  
 255 each of the 332 regions and finally took a mean FC matrix across the sample.  
 256

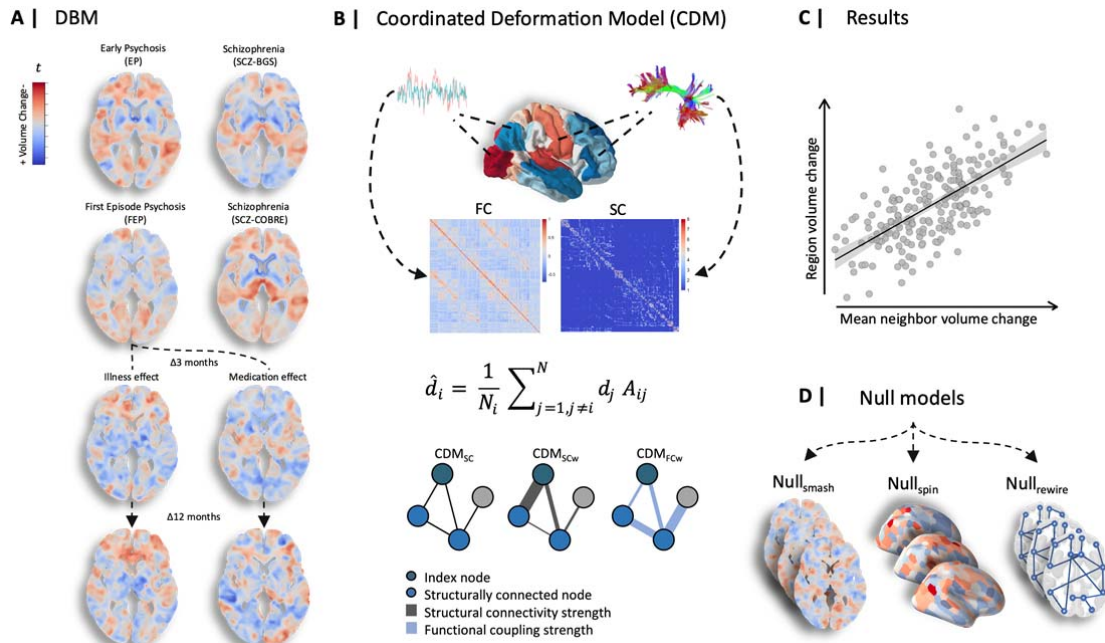

257  
 258 **Fig1. - Analysis workflow for the Coordinated Deformation Model.** (A) We derived voxel-wise GMV  
 259 estimates using Deformation-based morphometry (DBM). Five separate contrasts were specified using a robust  
 260 marginal model to infer baseline GMV differences and longitudinal GMV changes associated with illness and  
 261 antipsychotic medication at 3 months and 12 months. (B) The contrast statistics were mapped to a brain  
 262 parcellation comprising 332 regions, and diffusion and functional MRI data from an independent healthy sample  
 263 were used to generate sample-averaged functional coupling (FC) and structural connectivity (SC) matrices.  
 264 These matrices were used to model average volume changes in structurally connected neighbours. Under the  
 265 CDM, the predicted deformation of a node,  $\hat{d}_i$ , is modelled as a weighted sum of the deformation values

266 observed its structurally connected neighbours (shown as light blue nodes in the example graphs). The weights  
267 are given by the adjacency matrix,  $A_{ij}$ . Three different matrices were used, yielding three CDM variants; (1) A  
268 model denoted as  $CDM_{SC}$ , in which  $A_{ij} = 1$  if two regions share a connection and  $A_{ij} = 0$  otherwise; (2) a  
269 model denoted as  $CDM_{SCw}$  in which the elements of  $A_{ij}$  correspond precisely to the weighted SC matrix, such  
270 that the contribution of each neighbour is weighted by the strength of its structural connectivity to the index  
271 node; and (3) a model denoted  $CDM_{FCw}$ , in which the elements of  $A_{ij}$  correspond precisely to the weighted FC  
272 matrix, such that the contribution of each neighbour is weighted by its FC with the index node. (C) Model  
273 performance was evaluated using the Pearson correlation between regional estimates of observed and predicted  
274 GMV differences. (D) We also compared model performance to three benchmark null models accounting for  
275 spatial autocorrelations in the deformation maps ( $Null_{smash}$  and  $Null_{spin}$ ) and basic topological properties of the  
276 connectome ( $Null_{rewire}$ ; see *CDM evaluation*).

277

### 278 ***Coordinated Deformation Model (CDM) – Network Constraints***

279 We evaluated network constraints on cross-sectional and longitudinal GMV changes using the CDM  
280 introduced by Shafiei, et al.<sup>31</sup>. The model is given by

281

$$282 \hat{d}_i = \frac{1}{N_i} \sum_{j=1, j \neq i}^{N_i} A_{ij} d_j,$$

283

284 where  $\hat{d}_i$  is the predicted GMV change in node  $i$ ,  $N_i$  is the number of structurally connected  
285 neighbours of  $i$ ,  $d_j$  is the deformation observed in the  $j$ -th neighbour of node  $i$ , and  $A_{ij}$  defines the  
286 connectivity between nodes  $i$  and  $j$ .

287

288 Three different matrices were substituted for  $A_{ij}$ , yielding three variants of the CDM (Fig1B). For the  
289 first model, denoted  $CDM_{SC}$ ,  $A_{ij}=1$  if nodes  $i$  and  $j$  are connected in the group-average SC matrix and  
290 zero otherwise. Therefore, all  $j$  structurally connected neighbours make an equal contribution to  
291 predicting the extent of deformation observed in node  $i$ .

292

293 For the second and third models, denoted  $CDM_{SCw}$  and  $CDM_{FCw}$ ,  $A_{ij}$  corresponded to the weighted  
294 SC or FC matrices, respectively. Therefore, under these models, the contributions of node  $i$ 's  
295 neighbours were weighted by either inter-regional SC ( $CDM_{SCw}$ ) or FC ( $CDM_{FCw}$ ) estimates, such that  
296 neighbours of node  $i$  with a more strongly weighted connection made a stronger contribution to  
297 predicting node  $i$ 's volume change (Fig1B). In all models, only edges that had a corresponding  
298 structural connection were included and SC and FC edge weights were taken from the healthy  
299 reference connectome, unless otherwise specified.

300

### 301 ***CDM evaluation***

302 Model performance was evaluated using the product-moment correlation ( $r$ ) between region-wise  
303 estimates of observed and predicted deformation (Fig1C). We also compared the performance of the  
304  $CDM_{SC}$ ,  $CDM_{SCw}$  and  $CDM_{FCw}$  models to three benchmark null models. The first (Fig1D;  $Null_{smash}$ )  
305 and second (Fig1D;  $Null_{spin}$ ) null models evaluated whether the observed findings were specific to the  
306 empirically observed pattern of grey-matter deformations or were a generic property of the intrinsic  
307 spatial correlation structure of the deformation maps. The third null model (Fig1D;  $Null_{rewire}$ ) tests the  
308 hypothesis that any network-based prediction of local grey-matter change is specific to the actual  
309 topology of the connectome itself and cannot be explained by basic network properties, such as  
310 regional variations in node degree or the spatial dependence of inter-regional connectivity<sup>46</sup>. Further  
311 details about benchmark null models can be found in the Supplement1H.



312

### 313 ***Network Diffusion Model (NDM) – Epicentre Identification***

314 The CDM evaluates the degree to which spatial patterns of GMV change are shaped by connectome  
315 properties. A close coupling between GMV change and network architecture implies that volume loss  
316 spreads through the connectome, but the CDM offers limited insight into the dynamics of the  
317 spreading process, nor is it able to identify regions from which the spreading may initiate. We  
318 therefore used a NDM to directly test whether GMV loss spreads through the brain via a process of  
319 diffusion and whether certain brain regions act as sources, or epicentres, of pathological spread  
320 through the brain (Fig4)<sup>47</sup>. The NDM simulates the dynamic spread of pathology between the nodes  
321 of a weighted network via a process of diffusion (Fig4A), defined as

322

323

$$f(t) = e^{-\alpha H t} f_0,$$

324

325 where  $t$  is the model diffusion time, which has arbitrary units (a.u.), and  $f(t)$  is a vector  
326 characterizing the amount of diffusion in each region at time  $t$ . The strength of the diffusion process  
327 is controlled by a constant ( $\alpha$ ) and  $H$  is the Laplacian of the weighted SC matrix.  $f_0$  represents the  
328 initial distribution of pathology. We repeatedly initialized the model using each of the 332 regions as  
329 the starting seed, such that the initial state was set to 1 for the seed region, and 0 for all other regions.  
330 At each initialization, using a constant of  $\alpha = 1$ , the NDM was used to estimate the diffusion at all  
331 other regions at time  $t = 0$  to 50. In this way, we were able to determine whether a diffusion process  
332 seeded from each region resulted in a spatial distribution of volume loss that matched the empirically  
333 observed patterns. Further information about the NDM can be found in the Supplement1I.

334

### 335 ***NDM evaluation***

336 Consistent with prior work<sup>47,48</sup>, model performance was evaluated as the Pearson correlation between  
337 the predicted diffusion and observed volume abnormalities at each time step and for each seed, with  
338 the maximum correlation (Fig4A;  $r_{max}$ ) across all time steps being retained. The observed regional  $t$ -  
339 statistics were rescaled to a more interpretable non-negative quantity via a log-transformation,  
340 yielding values in the range  $[0,1]$ <sup>47-49</sup>. The seed region was excluded when correlating predicted and  
341 observed volume abnormalities to ensure that our analysis was not influenced by large volume  
342 abnormalities in the seeds. The performance of the NDM in capturing the empirical maps of GMV  
343 change was compared to its performance in capturing surrogate maps generated using the Null<sub>smash</sub> and  
344 Null<sub>rewire</sub> benchmark models (Fig4A). The Null<sub>spin</sub> benchmark was not used to evaluate the NDM as it  
345 does not include subcortical regions. Further details about benchmark null models used to evaluate the  
346 NDM can be found in the Supplement1I.

347

348 To aid comparison with previous research<sup>31</sup>, we also implemented a data-driven approach to epicentre  
349 identification that defines epicentres as regions with high volume loss that are also connected to other  
350 regions with high volume loss (FigS2; see Supplement1J for details). The spatial locations of  
351 epicentres identified by this approach closely aligned with the results of the NDM epicentre analysis.

352

## 353 **Results**

### 354 ***Structural connectivity shapes cross-sectional grey matter differences across illness stages***

355 We first evaluated the performance of the three CDMs in capturing cross-sectional differences in  
356 regional GMV. In all datasets, the CDM<sub>SCw</sub> model yielded more accurate predictions of cross-  
357 sectional empirical GMV case-control differences ( $.46 < r < .57$ ; Fig2E-H) when compared with

358 the CDM<sub>SC</sub> and CDM<sub>FCw</sub> models (*all*  $r < .35$  ; Fig2E-H). For all data sets, the performance of the  
 359 CDM<sub>SCw</sub> was also significantly better than all three benchmark models (*all*  $p < 0.01$ ). The CDM<sub>SC</sub>  
 360 and CDM<sub>FCw</sub> generally did not surpass the performance of the benchmark models.  
 361  
 362

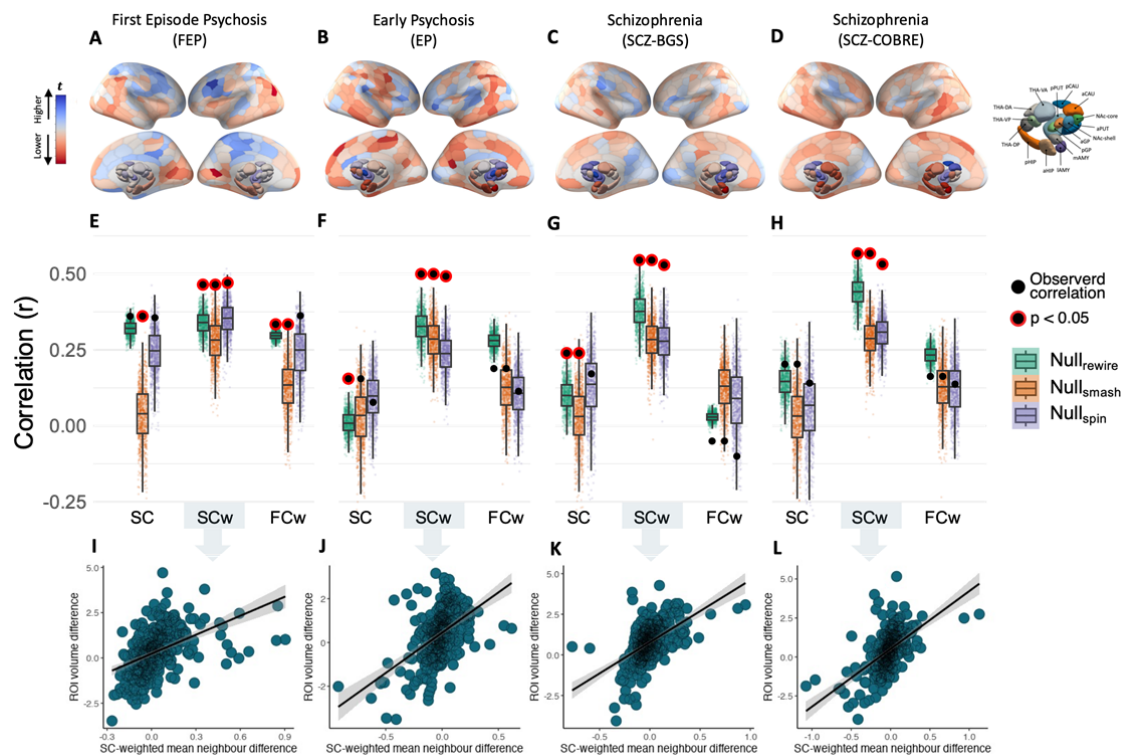

363  
 364 **Fig2. – Baseline and longitudinal illness-related GMV changes are constrained by connectome**  
 365 **anatomy.** (A-D) The contrast statistics for four cross-sectional contrasts mapped to a brain  
 366 parcellation comprising 332 regions. (E-H) Performance of the equally weighted (CDM<sub>SC</sub>), structural  
 367 connectivity-weighted (CDM<sub>SCw</sub>), and functional coupling-weighted (CDM<sub>FCw</sub>) models relative to the  
 368 Null<sub>smash</sub>, Null<sub>spin</sub>, and Null<sub>rewire</sub> benchmarks. Black circles indicate the observed rank correlations  
 369 between predicted and actual regional deformation values for each model at each timepoint, with red  
 370 borders indicating statistical significance. Note that the observed value used for comparison against  
 371 the Null<sub>spin</sub> models is different because the subcortex was excluded. (I-L) Scatterplots of the  
 372 association between observed and predicted regional volume deformation values for the best  
 373 performing CDM<sub>SCw</sub> model at each timepoint.

374  
 375 **Structural connectivity shapes longitudinal GMV changes**

376 Having robustly demonstrated that cross-sectional grey matter differences at different illness stages  
 377 are related to connectome structure, we next tested the implicit assumption of the CDM—that  
 378 longitudinal GMV changes spread across axonal pathways—by considering longitudinal illness-  
 379 related and medication-related changes in the FEP sample.  
 380

381 Predictions of the CDM<sub>SCw</sub> model for illness-related grey matter changes at 3 and 12 months were  
 382 correlated with empirical changes at  $r = .58$  (Fig3E) and  $r = .52$  (Fig3F), respectively, and both  
 383 were significantly better than all three benchmark models (*all*  $p < .001$ ). By comparison, correlations

384 for the  $CDM_{SC}$  and  $CDM_{FCw}$  did not exceed  $r = .38$  and only showed significantly better performance  
 385 compared to the  $Null_{smash}$  and the  $Null_{spin}$  at 3 months, but not connectome benchmarks (all  $p >$   
 386  $0.05$ ; Fig2E – F).

387

388 Predictions of the  $CDM_{SCw}$  model for antipsychotic-related grey-matter changes were correlated with  
 389 the empirical maps at  $r = .51$  (Fig3E) for 3 months and  $r = .25$  (Fig3F) for 12 months. This  
 390 association was statistically significant when compared to all three null models (all  $p < 0.01$ ; Fig3C-  
 391 D). Associations at 3 months and 12 months were smaller for the  $CDM_{SC}$  ( $r = .34$  and  $r = .24$ ,  
 392 respectively) and  $CDM_{FCw}$  models ( $r = .38$  and  $r = .31$ , respectively). At 3 months, the  $CDM_{SC}$  and  
 393  $CDM_{FCw}$  models only showed significantly better performance than the  $Null_{smash}$  and  $Null_{spin}$  ( $p <$   
 394  $.01$ ) benchmarks. At 12 months, the  $CDM_{SC}$  model showed significantly better performance than the  
 395  $Null_{smash}$  and  $Null_{rewire}$  benchmarks and the  $CDM_{SC}$  model showed significantly better performance  
 396 than the  $Null_{smash}$  and  $Null_{spin}$  benchmarks ( $p < .05$ ). Thus, connectome structure represents a generic  
 397 constraint on both illness-related and medication-related longitudinal GMV changes in psychosis.  
 398

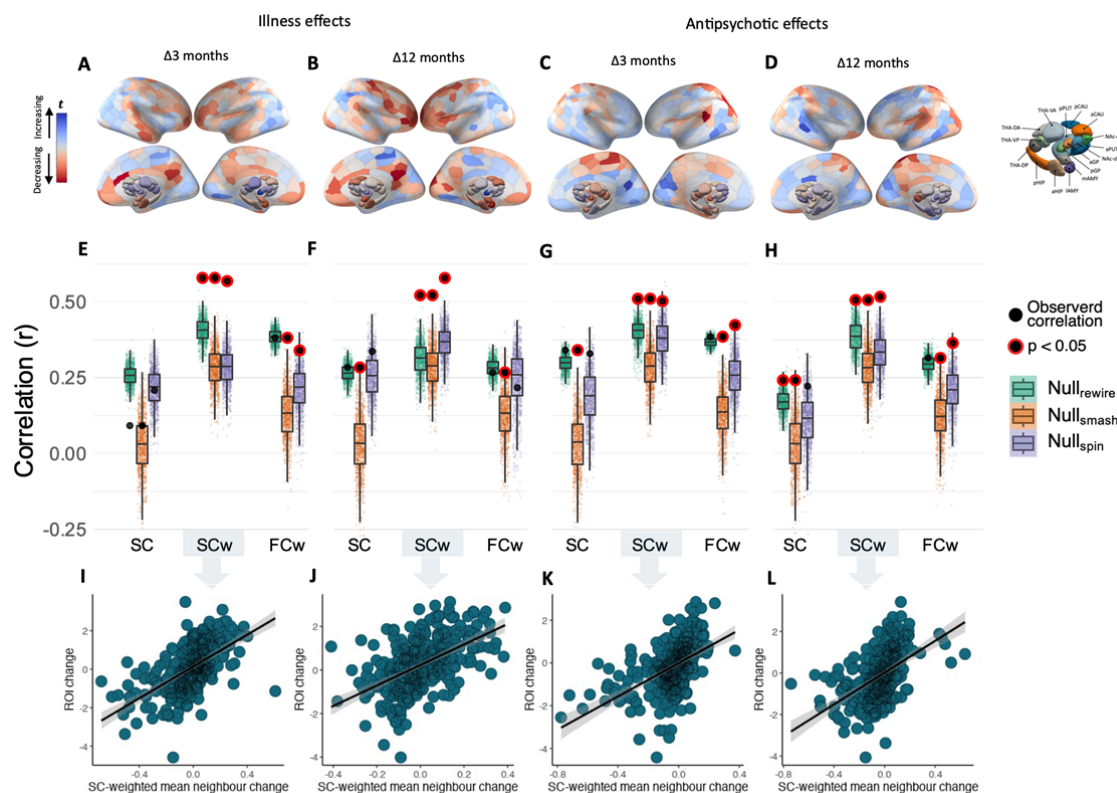

399

400 **Fig3 – Longitudinal illness-related and antipsychotic-related GMV changes are constrained by**  
 401 **connectome anatomy.** (A-D) The contrast statistics for illness-related and antipsychotic-related  
 402 contrasts mapped to a brain parcellation comprising 332 regions. (E-H) Performance of the equally  
 403 weighted ( $CDM_{SC}$ ), structural connectivity-weighted ( $CDM_{SCw}$ ) and functional coupling-weighted  
 404 ( $CDM_{FCw}$ ) models relative to the  $Null_{smash}$ ,  $Null_{spin}$ , and  $Null_{rewire}$  benchmarks. Black circles indicate  
 405 the observed rank correlations between predicted and actual regional deformation values for each  
 406 model at each timepoint, with red borders indicating statistical significance. Note that the observed  
 407 value used for comparison against the  $Null_{spin}$  models is different because the subcortex was excluded.  
 408 (I-L) Scatterplots of the association between observed and predicted regional deformation values for  
 409 the best performing  $CDM_{SCw}$  model at each timepoint.

410

411 ***Epicentres of grey matter volume loss***

412 We next used the NDM to simulate the dynamic spread of GMV loss from each individual brain  
413 region. Results using the Null<sub>smash</sub> benchmark are presented below (Fig4C-J) and results using the  
414 Null<sub>rewire</sub> benchmark are presented in the Supplement (FigS4). Across all cross-sectional comparisons,  
415 medial temporal lobe regions emerged as statistically significant epicentres (Fig4C-F). In particular,  
416 the anterior hippocampus was consistently implicated across all datasets ( $p < 0.05$ ), surviving  
417 multiple comparison correction ( $p_{FWE} < 0.05$ ) in the two schizophrenia samples. In the FEP dataset,  
418 additional epicentres were identified in bilateral occipital and temporal cortex, as well as  
419 hippocampus, amygdala, and posterior thalamic regions (Fig4C). In the EP dataset, additional  
420 epicentres were identified in temporal and posterior cingulate cortex, (Fig4D). In both schizophrenia  
421 samples, additional epicentres were identified in temporal cortex, amygdala, and posterior thalamic  
422 regions (Fig4E-F). Consistent results were obtained using the Null<sub>rewire</sub> benchmark (FigS4).

423

424 In the FEP sample, epicentres of longitudinal illness-related loss were identified in medial frontal  
425 regions at 3 months and progressed to include much of the frontal cortex, as well as striatal and  
426 thalamic regions, by 12 months (Fig4G-H). Comparison with the connectome-based null benchmarks  
427 were more conservative, but also implicated prefrontal regions (FigS4).

428

429 Epicentres of longitudinal antipsychotic-related GMV loss in FEP were identified in sensorimotor,  
430 cingulate and insula cortices, as well as thalamic and amygdala regions at 3 months, with the same  
431 cortical epicentres also identified at 12 months (Fig4I-J). These results were largely consistent when  
432 using the Null<sub>rewire</sub> models (FigS4). Scatter plots of observed and predicted volume abnormalities for  
433 all contrasts are provided in the Supplement (FigS3).

434

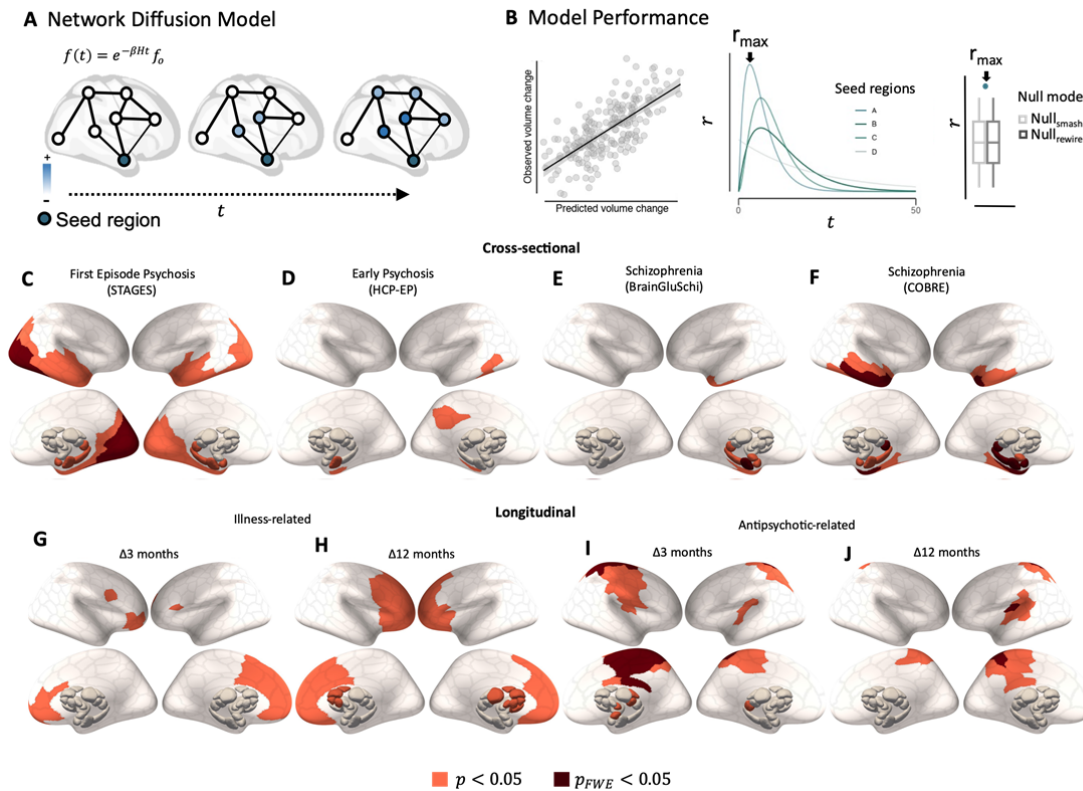

435

436

437 **Fig4 – Regional epicentres of grey matter loss.** (A) Epicentres were defined as potential sources of pathological  
 438 volume loss from which GMV reductions spread (Blue) to affect structurally connected areas. To identify such  
 439 regions, we simulated a spreading process using a Network Diffusion Model (NDM), (B) using each of the 332  
 440 parcellated regions as a seed, we retained the maximum correlation between the simulated and observed GMV  
 441 abnormalities ( $r_{max}$ ). For each contrast, we then compared  $r_{max}$  values for each region to distribution of  
 442  $r_{max}$  values from two benchmark null models accounting for spatial autocorrelations in the deformation maps  
 443 (Null<sub>smash</sub>) and basic topological properties of the connectome (see Model evaluation (NDM)). Regional  
 444 epicentres with significantly greater  $r_{max}$  than a spatially constrained null model (Orange =  $p < 0.05$ ; Red =  
 445  $p_{FWE} < 0.05$ ) are shown for cross-sectional (C-F) and longitudinal (G-J) effects. Results using Null<sub>rewire</sub>  
 446 benchmark models, and scatter plots of observed and predicted volume abnormalities are provided in  
 Supplement (FigS3).

447

448

449

450

451

452

453

454

455

456

457



458 ***Robustness analyses***

459 The magnitude and pattern of results remained consistent with our original findings after only  
460 considering individuals diagnosed with schizophrenia or schizophreniform disorder, indicating that  
461 diagnostic heterogeneity of the FEP and EP samples did not substantially impact our findings (FigS6).  
462

463 To ensure that the wide-spread changes in white-matter integrity often reported in patients<sup>50-53</sup> did not  
464 affect model estimates of the network-based spread of pathology, we replicated our findings using  
465 structural and functional connectomes derived from the FEP patient sample rather than the  
466 independent healthy control sample (FigS7). We also replicated the results using a representative  
467 structural connectome derived from the healthy control sample in the FEP study (FigS8).  
468

469 Finally, our findings were consistent when using VBM instead of DBM (FigS9), and when applying  
470 global signal regression (GSR) on subject-level FC matrices before computing the group average FC  
471 matrix (FigS10).

472 **Discussion**

473 The mechanisms driving spatially patterned grey matter volume (GMV) changes in psychotic illness  
474 have thus far been unclear. We have used a simple coordinated deformation model (CDM) to confirm  
475 that, across both early and later stages of illness, cross-sectional GMV changes are shaped by the  
476 topology and strength of structural, but not functional, connectivity between brain regions. We further  
477 found that both illness-related and antipsychotic-related longitudinal changes are constrained by  
478 structural connectivity, indicating that the temporal evolution of brain changes in the illness is also  
479 constrained by the brain's axonal pathways. Moreover, using a network diffusion model (NDM) to  
480 simulate the spread of pathology from different brain regions, we identified the anterior hippocampus  
481 as a putative epicentre of volume loss across all illness stages and further showed a dynamic  
482 progression of epicentres of dynamic grey matter loss from posterior to anterior areas, suggesting that  
483 the pathological burden within temporal and prefrontal systems increases as the illness progresses.  
484

485 ***Structural connectivity constrains GMV changes in psychotic illness***

486 The strength and topology of the structural connectome shaped the spatial pattern of volume  
487 abnormalities across both early and late stages of illness. Our findings in established schizophrenia  
488 align with previous research using the CDM to show that structural connectivity constrains the spatial  
489 patterning of cross-sectional GMV differences in people with established schizophrenia<sup>31</sup>. This earlier  
490 result was observed using the CDM<sub>SC</sub> model considered here. In our analysis, we found that the  
491 strength of structural connectivity between regions modulates coupled GMV differences within  
492 structurally connected neighbourhoods, given that the CDM<sub>SCw</sub> showed clearly superior performance  
493 to the CDM<sub>SC</sub> and CDM<sub>FCw</sub> models in all datasets. This result indicates that GMV differences are  
494 more tightly coupled between areas with high structural connectivity. Critically, our findings show  
495 that network constraints on cross-sectional GMV differences cannot be explained by antipsychotic  
496 medication, as our FEP sample was antipsychotic-naïve at the baseline scan. Moving beyond cross-  
497 sectional differences, our longitudinal analysis further demonstrates that both illness-related and  
498 antipsychotic-related changes in GMV are constrained by connectome architecture.  
499

500 These results are in line with a spreading process in which pathology propagates across axonal  
501 connections. The precise mechanisms driving this process remain unclear. While there is limited  
502 evidence for visible deposits of aggregated pathological proteins in psychotic illness, more subtle  
503 changes in protein homeostasis<sup>54</sup> may occur in subsets of patients and spread to synaptically



504 connected distant brain regions<sup>55</sup>. Alternatively, and given the commonly reported finding of  
505 functional brain alterations in psychotic disorders, dysfunction of one region may trigger abnormal  
506 activity in connected sites which, over time, may trigger structural changes as a result of aberrant  
507 neurotransmission or a loss of trophic support<sup>20</sup>. This process may be exacerbated by a breakdown of  
508 white-matter fibre integrity, which may further disrupt the inter-regional transport of trophic factors.  
509 Accordingly, widespread but subtle alterations in white matter have been repeatedly demonstrated in  
510 psychosis populations<sup>56</sup>, are anticorrelated with cortical thickness<sup>25</sup>, and may predate the transition to  
511 psychosis in high-risk samples<sup>50,51</sup>. Although our analyses suggest that using a structural connectome  
512 derived from a patient sample did not change the overall pattern of our findings, further work may  
513 investigate how coordinated GMV changes interact with white-matter pathology in patients.

514

515 An alternative explanation for our findings is that regions sharing a strong anatomical connection  
516 have a more similar molecular and cytoarchitectonic profile, resulting in a shared vulnerability to  
517 illness- or treatment-related changes<sup>57-60</sup>. Future research should examine associations between the  
518 strength of structural connectivity and shared molecular features such as receptor profiles, gene  
519 expression, and synaptic density in patient populations.

520

### 521 ***The medial temporal lobe as an epicentre of grey matter differences in psychosis***

522

523 Our NDM analysis indicated that the medial temporal lobe, and the anterior hippocampus in  
524 particular, is a putative source of GMV loss in psychosis. The hippocampus has repeatedly been  
525 implicated in the pathogenesis of psychosis. It has been linked to early neurodevelopmental  
526 aberrations<sup>61-63</sup> and often shows lower levels of mRNA and protein markers of synaptic and dendritic  
527 function post-mortem<sup>64,65</sup>. Recent *in vivo* PET imaging studies have also identified a loss of synaptic  
528 vesicle proteins<sup>66,67</sup>. Multiple animal models and human studies have indicated that a primary  
529 dysfunction occurring within the hippocampus<sup>68,69</sup>, such as a loss of pyramidal cell inhibition, results  
530 in downstream brain abnormalities including disinhibition of striatal dopamine release<sup>70,71</sup> and  
531 aberrant corticostriothalamic functioning<sup>72</sup>. Other evidence suggests that dysregulation of glutamate  
532 neurotransmission beginning in the CA1 region<sup>73,74</sup> initiates the transition to psychotic illness and  
533 eventuates in an atrophic process in which neuropil and interneurons are reduced in other medial  
534 temporal and structurally connected regions.

535

### 536 ***Regional epicentres of longitudinal grey matter change dynamically evolve with illness progression***

537

538 While the hippocampus was robustly implicated as a putative epicentre for cross-sectional GMV  
539 differences at different illness stages, our analysis of longitudinal changes in the FEP group identified  
540 putative epicentres in striatal and prefrontal areas. This contrasts the largely posterior focus of cortical  
541 epicentres for baseline GMV differences in this group, suggesting that the most pronounced  
542 longitudinal GMV changes occurring early in the illness affect the prefrontal cortex, which aligns  
543 with the greater involvement of striatal and prefrontal areas at the 12 compared to 3-month follow-up.  
544 These findings also accord with longitudinal studies in early-onset schizophrenia demonstrating a  
545 dynamic wave of volume contraction progressing from posterior to anterior regions,<sup>75,76</sup> and other  
546 evidence of pronounced prefrontal GMV reductions in the earliest stages of illness<sup>8,77-83</sup>, which may  
547 reflect an exaggeration of normal neurodevelopmental processes<sup>84,85</sup>. Notably, these regional  
548 epicentres of illness-related GMV loss were distinct from epicentres of antipsychotic-related GMV  
549 loss, which were identified in somatosensory, motor, and posterior cingulate regions.

550

551 ***Limitations and conclusions***

552 Our findings depend on group-level summary metrics of brain volume and may not be representative  
553 of volume changes at the individual patient level, which can show substantial heterogeneity<sup>86-88</sup>.  
554 Subsequent work could look at whether using individual-level measures of brain volume and  
555 connectivity can improve model predictions. Moreover, given the complexity and practical challenges  
556 of conducting a prospective triple-blind randomised control MRI study in antipsychotic-naïve  
557 patients, the sample size of the longitudinal FEP sample is small (see also<sup>89,90</sup> for a discussion of the  
558 representativeness of this sample). Replication of our longitudinal analysis in larger samples is thus  
559 warranted.

560

561 In summary, we identify a robust and central role for axonal connectivity as a conduit for the spread  
562 of pathology across early and late stages of psychotic illness, mirroring findings reported in  
563 neurodegenerative conditions. Our findings also align with animal models to suggest that medial  
564 temporal regions may play a critical role in the origins of brain dysfunction and indicate that the  
565 structural connectome represents a fundamental constraint on brain changes in psychosis, regardless  
566 of whether they are caused by illness or medication.

567

568

569

570

571

572

573

574

575

576

577

578

579

580

581

582

583 **Disclosures/Conflict of Interest**

584 SF, KA, MAJ and AF reported receiving grants from the Australian National Health & Medical  
585 Research Council (NHMRC) and Australian Research Council (ARC) during the conduct of the  
586 study. CP reported receiving grants from the Australian NHMRC and from the Lundbeck Foundation  
587 and personal fees from Lundbeck Australia Pty Ltd Advisory Board for talks presented at educational  
588 meetings organized by Lundbeck. PM reported receiving grants from the Australian NHMRC, the  
589 Colonial Foundation, the National Alliance for Research on Schizophrenia and Depression, the  
590 Stanley Foundation, the National Institutes of Health, Wellcome Trust, the Australian and Victorian  
591 governments, and Janssen-Cilag (unrestricted investigator-initiated grant) during the conduct of the  
592 study; past unrestricted grant funding from Janssen-Cilag, AstraZeneca, Eli Lilly, Novartis, and  
593 Pfizer; honoraria for consultancy and teaching from Janssen-Cilag, Eli Lilly, Pfizer, AstraZeneca,  
594 Roche, Bristol Myers Squibb, and Lundbeck. BN was supported by an NHMRC Senior Research  
595 Fellowship (1137687) and a University of Melbourne Dame Kate Campbell Fellowship. This work  
596 was supported by the computational infrastructure provided by the MASSIVE HPC facility  
597 ([www.massive.org.au](http://www.massive.org.au)).

598

599  
600  
601  
602  
603  
604  
605  
606  
607  
608  
609  
610  
611  
612  
613  
614  
615  
616  
617  
618  
619  
620  
621  
622  
623  
624  
625  
626  
627  
628  
629  
630  
631  
632  
633  
634  
635  
636  
637  
638  
639  
640  
641  
642  
643  
644  
645  
646  
647

## References

- 1 Gur, R. E., Turetsky, B. I., Bilker, W. B. & Gur, R. C. Reduced Gray Matter Volume in Schizophrenia. *Archives of General Psychiatry* **56**, 905-911, doi:10.1001/archpsyc.56.10.905 (1999).
- 2 Haijma, S. V. *et al.* Brain Volumes in Schizophrenia: A Meta-Analysis in Over 18 000 Subjects. *Schizophrenia Bulletin* **39**, 1129-1138, doi:10.1093/schbul/sbs118 (2013).
- 3 Steen, R. G., Mull, C., McClure, R., Hamer, R. M. & Lieberman, J. A. Brain volume in first-episode schizophrenia. *British Journal of Psychiatry* **188**, 510-518, doi:10.1192/bjp.188.6.510 (2006).
- 4 van Erp, T. G. M. *et al.* Cortical Brain Abnormalities in 4474 Individuals With Schizophrenia and 5098 Control Subjects via the Enhancing Neuro Imaging Genetics Through Meta Analysis (ENIGMA) Consortium. *Biological Psychiatry* **84**, 644-654, doi:10.1016/j.biopsych.2018.04.023 (2018).
- 5 van Erp, T. G. M. *et al.* Subcortical brain volume abnormalities in 2028 individuals with schizophrenia and 2540 healthy controls via the ENIGMA consortium. *Molecular Psychiatry* **21**, 547-553, doi:10.1038/mp.2015.63 (2016).
- 6 Gupta, C. N. *et al.* Patterns of Gray Matter Abnormalities in Schizophrenia Based on an International Mega-analysis. *Schizophrenia Bulletin* **41**, 1133-1142, doi:10.1093/schbul/sbu177 (2015).
- 7 Vieira, S. *et al.* Neuroanatomical abnormalities in first-episode psychosis across independent samples: a multi-centre mega-analysis. *Psychological Medicine* **51**, 340-350, doi:10.1017/s0033291719003568 (2021).
- 8 Pantelis, C. *et al.* Neuroanatomical abnormalities before and after onset of psychosis: a cross-sectional and longitudinal MRI comparison. *The Lancet* **361**, 281-288, doi:10.1016/S0140-6736(03)12323-9 (2003).
- 9 Vita, A., De Peri, L., Deste, G. & Sacchetti, E. Progressive loss of cortical gray matter in schizophrenia: a meta-analysis and meta-regression of longitudinal MRI studies. *Translational Psychiatry* **2**, e190-e190, doi:10.1038/tp.2012.116 (2012).
- 10 Akudjedu, T. N. *et al.* Progression of neuroanatomical abnormalities after first-episode of psychosis: A 3-year longitudinal sMRI study. *Journal of Psychiatric Research* **130**, 137-151, doi:10.1016/j.jpsychires.2020.07.034 (2020).
- 11 Olabi, B. *et al.* Are there progressive brain changes in schizophrenia? A meta-analysis of structural magnetic resonance imaging studies. *Biological Psychiatry* **70**, 88-96, doi:10.1016/j.biopsych.2011.01.032 (2011).
- 12 Andreasen, N. C. *et al.* Progressive Brain Change in Schizophrenia: A Prospective Longitudinal Study of First-Episode Schizophrenia. *Biological psychiatry* **70**, 672-679, doi:10.1016/j.biopsych.2011.05.017 (2011).
- 13 Chopra, S. *et al.* Differentiating the Effect of Medication and Illness on Brain Volume Reductions in First-Episode Psychosis: A Longitudinal, Randomized, Triple-blind, Placebo-controlled MRI study. *medRxiv* (2020).
- 14 Liloia, D. *et al.* Updating and characterizing neuroanatomical markers in high-risk subjects, recently diagnosed and chronic patients with schizophrenia: A revised coordinate-based meta-analysis. *Neuroscience & Biobehavioral Reviews* **123**, 83-103 (2021).
- 15 Bora, E. *et al.* Neuroanatomical abnormalities in schizophrenia: A multimodal voxelwise meta-analysis and meta-regression analysis. *Schizophrenia Research* **127**, 46-57, doi:10.1016/j.schres.2010.12.020 (2011).

- 648 16 Fornito, A., Yücel, M., Patti, J., Wood, S. J. & Pantelis, C. Mapping grey matter  
649 reductions in schizophrenia: An anatomical likelihood estimation analysis of voxel-  
650 based morphometry studies. *Schizophrenia Research* **108**, 104-113,  
651 doi:10.1016/j.schres.2008.12.011 (2009).
- 652 17 Del Re, E. C. *et al.* Anterior-posterior axis of hippocampal subfields across  
653 psychoses: A B-SNIP study. *Biomarkers in Neuropsychiatry* **5**, 100037,  
654 doi:<https://doi.org/10.1016/j.bionps.2021.100037> (2021).
- 655 18 Sporns, O., Tononi, G. & Kötter, R. The Human Null<sub>rewire</sub>: A Structural Description of  
656 the Human Brain. *PLOS Computational Biology* **1**, e42,  
657 doi:10.1371/journal.pcbi.0010042 (2005).
- 658 19 Raj, A. & Powell, F. Models of Network Spread and Network Degeneration in Brain  
659 Disorders. *Biological Psychiatry: Cognitive Neuroscience and Neuroimaging* **3**, 788-  
660 797, doi:10.1016/j.bpsc.2018.07.012 (2018).
- 661 20 Fornito, A., Zalesky, A. & Breakspear, M. The connectomics of brain disorders.  
662 doi:10.1038/nrn3901 (2015).
- 663 21 Seeley, W. W., Crawford, R. K., Zhou, J., Miller, B. L. & Greicius, M. D.  
664 Neurodegenerative diseases target large-scale human brain networks. *Neuron* **62**, 42-  
665 52 (2009).
- 666 22 Zhou, J., Gennatas, E. D., Kramer, J. H., Miller, B. L. & Seeley, W. W. Predicting  
667 regional neurodegeneration from the healthy brain functional connectome. *Neuron* **73**,  
668 1216-1227 (2012).
- 669 23 Raj, A., Kuceyeski, A. & Weiner, M. A network diffusion model of disease  
670 progression in dementia. *Neuron* **73**, 1204-1215, doi:10.1016/j.neuron.2011.12.040  
671 (2012).
- 672 24 Shafiei, G. *et al.* Network structure and transcriptomic vulnerability shape atrophy in  
673 frontotemporal dementia. *Brain*, doi:10.1093/brain/awac069 (2022).
- 674 25 Di Biase, M. A. *et al.* Linking Cortical and Connectional Pathology in Schizophrenia.  
675 *Schizophr Bull* **45**, 911-923, doi:10.1093/schbul/sby121 (2019).
- 676 26 Wannan, C. M. J. *et al.* Evidence for Network-Based Cortical Thickness Reductions  
677 in Schizophrenia. *American Journal of Psychiatry*, appi.ajp.2019.18040380,  
678 doi:10.1176/appi.ajp.2019.18040380 (2019).
- 679 27 Cauda, F. *et al.* The morphometric co-atrophy networking of schizophrenia, autistic  
680 and obsessive spectrum disorders. *Hum Brain Mapp* **39**, 1898-1928,  
681 doi:10.1002/hbm.23952 (2018).
- 682 28 Jiang, Y. *et al.* Antipsychotics effects on network-level reconfiguration of cortical  
683 morphometry in first-episode schizophrenia. *medRxiv*, 2021.2001.2017.21249965,  
684 doi:10.1101/2021.01.17.21249965 (2021).
- 685 29 Hettwer, M. *et al.* Coordinated cortical thickness alterations across six  
686 neurodevelopmental and psychiatric disorders. *Nature Communications* **13**, 1-14  
687 (2022).
- 688 30 Cauda, F. *et al.* Brain structural alterations are distributed following functional,  
689 anatomic and genetic connectivity. *Brain* **141**, 3211-3232 (2018).
- 690 31 Shafiei, G. *et al.* Spatial patterning of tissue volume loss in schizophrenia reflects  
691 brain network architecture. *Biological psychiatry* **87**, 727-735 (2020).
- 692 32 Chopra, S. *et al.* Functional connectivity in antipsychotic-treated and antipsychotic-  
693 naive patients with first-episode psychosis and low risk of self-harm or aggression: a  
694 secondary analysis of a randomized clinical trial. *JAMA psychiatry* **78**, 994-1004  
695 (2021).

- 696 33 Francey, S. M. *et al.* Psychosocial Intervention With or Without Antipsychotic  
697 Medication for First-Episode Psychosis: A Randomized Noninferiority Clinical Trial.  
698 *Schizophrenia Bulletin Open* **1**, doi:10.1093/schizbullopen/sgaa015 (2020).
- 699 34 Lewandowski, K. E., Bouix, S., Ongur, D. & Shenton, M. E. Neuroprogression across  
700 the early course of psychosis. *Journal of psychiatry and brain science* **5** (2020).
- 701 35 Bustillo, J. R. *et al.* Glutamatergic and neuronal dysfunction in gray and white matter:  
702 a spectroscopic imaging study in a large schizophrenia sample. *Schizophrenia bulletin*  
703 **43**, 611-619 (2017).
- 704 36 Çetin, M. S. *et al.* Thalamus and posterior temporal lobe show greater inter-network  
705 connectivity at rest and across sensory paradigms in schizophrenia. *Neuroimage* **97**,  
706 117-126, doi:10.1016/j.neuroimage.2014.04.009 (2014).
- 707 37 Esteban, O. *et al.* MRIQC: Advancing the automatic prediction of image quality in  
708 MRI from unseen sites. *PLOS ONE* **12**, e0184661, doi:10.1371/journal.pone.0184661  
709 (2017).
- 710 38 Gaser, C. & Dahnke, R. CAT - A Computational Anatomy Toolbox for the Analysis  
711 of Structural MRI Data. *HBM*, 336-348 (2016).
- 712 39 Ashburner, J. *et al.* SPM12 manual. *Wellcome Trust Centre for Neuroimaging*,  
713 *London, UK* **2464** (2014).
- 714 40 Schwarz, D. & Kašpárek, T. Comparison of Two Methods for Automatic Brain  
715 Morphometry Analysis. *Radioengineering* **20** (2011).
- 716 41 Guillaume, B., Hua, X., Thompson, P. M., Waldorp, L. & Nichols, T. E. Fast and  
717 accurate modelling of longitudinal and repeated measures neuroimaging data.  
718 *NeuroImage* **94**, 287-302, doi:10.1016/j.neuroimage.2014.03.029 (2014).
- 719 42 Schaefer, A. *et al.* Local-Global Parcellation of the Human Cerebral Cortex from  
720 Intrinsic Functional Connectivity MRI. *Cerebral Cortex (New York, N.Y.: 1991)* **28**,  
721 3095-3114, doi:10.1093/cercor/bhx179 (2018).
- 722 43 Tian, Y., Margulies, D. S., Breakspear, M. & Zalesky, A. Topographic organization  
723 of the human subcortex unveiled with functional connectivity gradients. *Nature*  
724 *Neuroscience* **23**, 1421-1432, doi:10.1038/s41593-020-00711-6 (2020).
- 725 44 Murphy, K. & Fox, M. D. Towards a consensus regarding global signal regression for  
726 resting state functional connectivity MRI. *Neuroimage* **154**, 169-173,  
727 doi:10.1016/j.neuroimage.2016.11.052 (2017).
- 728 45 Aquino, K. M., Fulcher, B. D., Parkes, L., Sabarodien, K. & Fornito, A. Identifying  
729 and removing widespread signal deflections from fMRI data: Rethinking the global  
730 signal regression problem. *Neuroimage* **212**, 116614 (2020).
- 731 46 Betzel, R. F. & Bassett, D. S. Specificity and robustness of long-distance connections  
732 in weighted, interareal connectomes. *Proceedings of the National Academy of*  
733 *Sciences*, 201720186, doi:10.1073/PNAS.1720186115 (2018).
- 734 47 Raj, A., Kuceyeski, A. & Weiner, M. A network diffusion model of disease  
735 progression in dementia. *Neuron* **73**, 1204-1215, doi:10.1016/j.neuron.2011.12.040  
736 (2012).
- 737 48 Raj, A. *et al.* Network diffusion model of progression predicts longitudinal patterns of  
738 atrophy and metabolism in Alzheimer's disease. *Cell reports* **10**, 359-369 (2015).
- 739 49 Pandya, S. *et al.* Predictive model of spread of Parkinson's pathology using network  
740 diffusion. *NeuroImage* **192**, 178-194 (2019).
- 741 50 Carletti, F. *et al.* Alterations in White Matter Evident Before the Onset of Psychosis.  
742 *Schizophrenia Bulletin* **38**, 1170-1179, doi:10.1093/schbul/sbs053 (2012).
- 743 51 Di Biase, M. A. *et al.* White matter changes in psychosis risk relate to development  
744 and are not impacted by the transition to psychosis. *Molecular Psychiatry*,  
745 doi:10.1038/s41380-021-01128-8 (2021).



- 746 52 Kraguljac, N. V. *et al.* White matter integrity, duration of untreated psychosis, and  
747 antipsychotic treatment response in medication-naïve first-episode psychosis patients.  
748 *Molecular Psychiatry* **26**, 5347-5356, doi:10.1038/s41380-020-0765-x (2021).
- 749 53 Kelly, S. *et al.* Widespread white matter microstructural differences in schizophrenia  
750 across 4322 individuals: results from the ENIGMA Schizophrenia DTI Working  
751 Group. *Molecular psychiatry* **23**, 1261-1269 (2018).
- 752 54 Bradshaw, N. J. & Korth, C. Protein misassembly and aggregation as potential  
753 convergence points for non-genetic causes of chronic mental illness. *Molecular*  
754 *psychiatry* **24**, 936-951 (2019).
- 755 55 Guo, J. L. & Lee, V. M. Cell-to-cell transmission of pathogenic proteins in  
756 neurodegenerative diseases. *Nature medicine* **20**, 130-138 (2014).
- 757 56 Yao, L. *et al.* White matter deficits in first episode schizophrenia: An activation  
758 likelihood estimation meta-analysis. *Progress in Neuro-Psychopharmacology and*  
759 *Biological Psychiatry* **45**, 100-106, doi:<https://doi.org/10.1016/j.pnpbp.2013.04.019>  
760 (2013).
- 761 57 Arnatkeviciute, A. *et al.* Genetic influences on hub connectivity of the human  
762 connectome. *Nature Communications* **12**, 4237, doi:10.1038/s41467-021-24306-2  
763 (2021).
- 764 58 Fornito, A., Arnatkevičiūtė, A. & Fulcher, B. D. Bridging the Gap between Null<sub>rewire</sub>  
765 and Transcriptome. *Trends Cogn Sci* **23**, 34-50, doi:10.1016/j.tics.2018.10.005  
766 (2019).
- 767 59 Hansen, J. Y. *et al.* Mapping neurotransmitter systems to the structural and functional  
768 organization of the human neocortex. *bioRxiv*, 2021.2010.2028.466336,  
769 doi:10.1101/2021.10.28.466336 (2022).
- 770 60 Hansen, J. Y. *et al.* Local molecular and global connectomic contributions to cross-  
771 disorder cortical abnormalities. *Nature communications* **13**, 1-17 (2022).
- 772 61 Lipska, B. K. & Weinberger, D. R. A neurodevelopmental model of schizophrenia:  
773 neonatal disconnection of the hippocampus. *Neurotoxicity research* **4**, 469-475  
774 (2002).
- 775 62 Rosso, I. M. *et al.* Obstetric risk factors for early-onset schizophrenia in a Finnish  
776 birth cohort. *American Journal of Psychiatry* **157**, 801-807 (2000).
- 777 63 Bearden, C. E., Meyer, S. E., Loewy, R. L., Niendam, T. A. & Cannon, T. D. The  
778 neurodevelopmental model of schizophrenia: Updated. *Developmental*  
779 *Psychopathology: Volume Three: Risk, Disorder, and Adaptation*, 542-569 (2015).
- 780 64 Osimo, E. F., Beck, K., Reis Marques, T. & Howes, O. D. Synaptic loss in  
781 schizophrenia: a meta-analysis and systematic review of synaptic protein and mRNA  
782 measures. *Molecular Psychiatry* **24**, 549-561, doi:10.1038/s41380-018-0041-5  
783 (2019).
- 784 65 Harrison, P. J. & Eastwood, S. L. Neuropathological studies of synaptic connectivity  
785 in the hippocampal formation in schizophrenia. *Hippocampus* **11**, 508-519 (2001).
- 786 66 Radhakrishnan, R. *et al.* In vivo evidence of lower synaptic vesicle density in  
787 schizophrenia. *Molecular Psychiatry*, doi:10.1038/s41380-021-01184-0 (2021).
- 788 67 Onwordi, E. C. *et al.* Synaptic density marker SV2A is reduced in schizophrenia  
789 patients and unaffected by antipsychotics in rats. *Nature Communications* **11**, 246,  
790 doi:10.1038/s41467-019-14122-0 (2020).
- 791 68 Weinberger, D. R. Implications of Normal Brain Development for the Pathogenesis of  
792 Schizophrenia. *Archives of General Psychiatry* **44**, 660-669,  
793 doi:10.1001/archpsyc.1987.01800190080012 (1987).



- 794 69 Lodge, D. J. & Grace, A. A. Hippocampal dysregulation of dopamine system function  
795 and the pathophysiology of schizophrenia. *Trends in pharmacological sciences* **32**,  
796 507-513 (2011).
- 797 70 Grace, A. Dopamine system dysregulation by the hippocampus: implications for the  
798 pathophysiology and treatment of schizophrenia. *Neuropharmacology* **62**, 1342-1348  
799 (2012).
- 800 71 Modinos, G., Allen, P., Grace, A. A. & McGuire, P. Translating the MAM model of  
801 psychosis to humans. *Trends Neurosci* **38**, 129-138, doi:10.1016/j.tins.2014.12.005  
802 (2015).
- 803 72 Sabaroedin, K., Tiego, J. & Fornito, A. Circuit-based approaches to understanding  
804 corticostriothalamic dysfunction across the psychosis continuum. *Biological*  
805 *Psychiatry* (2022).
- 806 73 Lieberman, J. *et al.* Hippocampal dysfunction in the pathophysiology of  
807 schizophrenia: a selective review and hypothesis for early detection and intervention.  
808 *Molecular psychiatry* **23**, 1764-1772 (2018).
- 809 74 Schobel, S. A. *et al.* Imaging patients with psychosis and a mouse model establishes a  
810 spreading pattern of hippocampal dysfunction and implicates glutamate as a driver.  
811 *Neuron* **78**, 81-93 (2013).
- 812 75 Vidal, C. N. *et al.* Dynamically Spreading Frontal and Cingulate Deficits Mapped in  
813 Adolescents With Schizophrenia. *Archives of General Psychiatry* **63**, 25-34,  
814 doi:10.1001/archpsyc.63.1.25 (2006).
- 815 76 Thompson, P. M. *et al.* Mapping adolescent brain change reveals dynamic wave of  
816 accelerated gray matter loss in very early-onset schizophrenia. *Proceedings of the*  
817 *National Academy of Sciences* **98**, 11650-11655, doi:10.1073/pnas.201243998 (2001).
- 818 77 Sun, D. *et al.* Progressive Brain Structural Changes Mapped as Psychosis Develops in  
819 'At Risk' Individuals. *Schizophrenia research* **108**, 85-92,  
820 doi:10.1016/j.schres.2008.11.026 (2009).
- 821 78 Sun, D. *et al.* Brain surface contraction mapped in first-episode schizophrenia: a  
822 longitudinal magnetic resonance imaging study. *Molecular Psychiatry* **14**, 976-986,  
823 doi:10.1038/mp.2008.34 (2009).
- 824 79 Jalbrzikowski, M. Association of Structural Magnetic Resonance Imaging Measures  
825 With Psychosis Onset in Individuals at Clinical High Risk for Developing Psychosis:  
826 An ENIGMA Working Group Mega-analysis. *JAMA Psychiatry* **78**, 753-766,  
827 doi:10.1001/jamapsychiatry.2021.0638 (2021).
- 828 80 Cannon, T. D. *et al.* Progressive reduction in cortical thickness as psychosis develops:  
829 a multisite longitudinal neuroimaging study of youth at elevated clinical risk. *Biol*  
830 *Psychiatry* **77**, 147-157, doi:10.1016/j.biopsych.2014.05.023 (2015).
- 831 81 Chung, Y. *et al.* Cortical abnormalities in youth at clinical high-risk for psychosis:  
832 Findings from the NAPLS2 cohort. *NeuroImage: Clinical* **23**, 101862,  
833 doi:<https://doi.org/10.1016/j.nicl.2019.101862> (2019).
- 834 82 Del Re, E. C. *et al.* Baseline Cortical Thickness Reductions in Clinical High Risk for  
835 Psychosis: Brain Regions Associated with Conversion to Psychosis Versus Non-  
836 Conversion as Assessed at One-Year Follow-Up in the Shanghai-At-Risk-for-  
837 Psychosis (SHARP) Study. *Schizophrenia Bulletin* **47**, 562-574 (2021).
- 838 83 Collins, M. A. *et al.* Accelerated cortical thinning precedes and predicts conversion to  
839 psychosis: The NAPLS3 longitudinal study of youth at clinical high-risk. *Mol*  
840 *Psychiatry*, doi:10.1038/s41380-022-01870-7 (2022).
- 841 84 Cropley, V. L. *et al.* Accelerated Gray and White Matter Deterioration With Age in  
842 Schizophrenia. *Am J Psychiatry* **174**, 286-295, doi:10.1176/appi.ajp.2016.16050610  
843 (2017).

- 844 85 Gogtay, N., Vyas, N. S., Testa, R., Wood, S. J. & Pantelis, C. Age of onset of  
845 schizophrenia: perspectives from structural neuroimaging studies. *Schizophr Bull* **37**,  
846 504-513, doi:10.1093/schbul/sbr030 (2011).
- 847 86 Wolfers, T. *et al.* Mapping the Heterogeneous Phenotype of Schizophrenia and  
848 Bipolar Disorder Using Normative Models. *JAMA Psychiatry*,  
849 doi:10.1001/jamapsychiatry.2018.2467 (2018).
- 850 87 Lv, J. *et al.* Individual deviations from normative models of brain structure in a large  
851 cross-sectional schizophrenia cohort. *Molecular Psychiatry* **26**, 3512-3523,  
852 doi:10.1038/s41380-020-00882-5 (2021).
- 853 88 Segal, A. *et al.* Regional, circuit, and network heterogeneity of brain abnormalities in  
854 psychiatric disorders. *medRxiv*, 2022.2003.2007.22271986,  
855 doi:10.1101/2022.03.07.22271986 (2022).
- 856 89 Leucht, S. *et al.* Clinical implications of Brief Psychiatric Rating Scale scores. *British*  
857 *Journal of Psychiatry* **187**, 366-371, doi:10.1192/bjp.187.4.366 (2005).
- 858 90 Henry, L. P. *et al.* The EPPIC Follow-Up Study of First-Episode Psychosis: Longer-  
859 Term Clinical and Functional Outcome 7 Years After Index Admission. *The Journal*  
860 *of Clinical Psychiatry* **71**, 716-728, doi:10.4088/JCP.08m04846yel (2010).  
861
